# Supplementary material for: Aspirin and Extended-Release Dipyridamole versus Clopidogrel for Recurrent Stroke
Source: Atypon-hosted journal article supplement (doi:10.1056/nejmoa0805002), 2008-08-27
Supplement: nejm_sacco_1238sa1.pdf [file nejm_sacco_1238sa1.pdf]

## Supplementary Appendix

This appendix has been provided by the authors to give readers additional information about their work.

Supplement to: Sacco RL, Diener H-C, Yusuf S, et al. Aspirin and extended-release dipyridamole versus clopidogrel for recurrent stroke. *N Engl J Med* 2008;359:1238-51. DOI: 10.1056/NEJMoa0805002.

**APPENDIX I.** Primary, secondary and tertiary outcome events of the PRoFESS trial.

| PRIMARY OUTCOME EVENT                                                                                                                                                                                                                                                                                                                                                                                                             | TERTIARY OUTCOME EVENTS                                                                                                                                                                                                                                                                              |
|-----------------------------------------------------------------------------------------------------------------------------------------------------------------------------------------------------------------------------------------------------------------------------------------------------------------------------------------------------------------------------------------------------------------------------------|------------------------------------------------------------------------------------------------------------------------------------------------------------------------------------------------------------------------------------------------------------------------------------------------------|
| <p><u>Stroke (nonfatal or fatal)</u></p> <p>Ischemic OR</p> <p>Hemorrhagic OR</p> <p>Of uncertain cause</p>                                                                                                                                                                                                                                                                                                                       | <p><u>Stroke or major hemorrhagic event</u></p> <p><u>Death</u></p> <p>Classification of Death:</p> <p>Ischemic stroke, hemorrhagic stroke, stroke of uncertain cause, MI, hemorrhage excluding intracranial bleeding, other vascular causes, non-vascular causes</p>                                |
| <hr/> <p>SECONDARY OUTCOME EVENTS</p> <p>Antiplatelet comparison:</p> <p><u>Vascular events</u></p> <p>Stroke (non-fatal or fatal) OR</p> <p>Myocardial infarction (non-fatal or fatal) OR</p> <p>Vascular death</p> <p>Telmisartan Comparison:</p> <p><u>Vascular events or CHF</u></p> <p>Stroke (non-fatal or fatal) OR</p> <p>MI (non-fatal or fatal) OR</p> <p>Vascular death OR</p> <p>New or Worsening CHF<sup>1</sup></p> | <p><u>Major hemorrhagic events</u></p> <p>Life-threatening</p> <p>Non-life-threatening</p> <p>Classifications of hemorrhagic events (both major or minor):</p> <p>Hematuria, hematemesis, gastrointestinal, epistaxis, intraocular, purpura, gynecologic, internal bleeding, intracranial, other</p> |
| <p><u>New-onset diabetes</u></p>                                                                                                                                                                                                                                                                                                                                                                                                  | <p><u>Other designated vascular events</u></p> <p>Pulmonary embolism OR</p> <p>Retinal vascular accidents<sup>2</sup> OR</p> <p>Deep vein thrombosis OR</p> <p>Peripheral arterial occlusion OR</p> <p>TIA OR</p> <p>Cerebral venous thrombosis<sup>3</sup></p> <p><u>New or worsening CHF</u></p>   |

|  |                                                                                                                                                                                                                                                                                                                                                                                                                                                                                                               |
|--|---------------------------------------------------------------------------------------------------------------------------------------------------------------------------------------------------------------------------------------------------------------------------------------------------------------------------------------------------------------------------------------------------------------------------------------------------------------------------------------------------------------|
|  | <p><u>Thrombotic thrombocytopenic purpura</u></p> <p><u>Neutropenia</u></p> <p style="padding-left: 40px;">Non-severe OR</p> <p style="padding-left: 40px;">severe</p> <p><u>Ischaemic stroke</u></p> <p><u>Ischaemic Stroke Subtype:</u></p> <p>Large-artery atherosclerosis; cardioembolism; small-artery occlusion (lacune); acute stroke of other determined etiology; stroke of undetermined etiology</p> <p><u>Other endpoints:</u> MMSE, modified Rankin, EQ-5D, Barthel, post-stroke chronic pain</p> |
|--|---------------------------------------------------------------------------------------------------------------------------------------------------------------------------------------------------------------------------------------------------------------------------------------------------------------------------------------------------------------------------------------------------------------------------------------------------------------------------------------------------------------|

CHF = congestive heart failure; MI = myocardial infarction; TIA = transient ischemic

attack; MMSE = Mini Mental State Examination; QOL = Quality of life

<sup>1</sup>New or worsening CHF is defined as a patient who is hospitalized for CHF symptoms, or a patient is seen in the emergency room for CHF symptoms, or a patient is treated with intravenous diuretics.

<sup>2</sup>Retinal vascular accidents that are not confirmed retinal arterial occlusions. The latter are defined as strokes.

<sup>3</sup>Cerebral venous thrombosis as opposed to arterial thrombosis.

**APPENDIX IIA: Frequency [N(%)] of most commonly reported serious adverse events**

(at least 0.4% at the patient level in any group) by treatment, primary system organ

class, and preferred term (randomised patients).

| System organ class/preferred term                    | ASA-ERDP<br>N (%) | Clopidogrel<br>N (%) |
|------------------------------------------------------|-------------------|----------------------|
| Number of patients                                   | 10181 (100.00)    | 10151 (100.00)       |
| Total with serious adverse events                    | 2749 (27.0)       | 2724 (26.8)          |
| Blood and lymphatic system disorders                 | 91 (0.9)          | 70 (0.7)             |
| Anaemia                                              | 58 (0.6)          | 44 (0.4)             |
| Cardiac disorders                                    | 470 (4.6)         | 463 (4.6)            |
| Angina unstable                                      | 119 (1.2)         | 89 (0.9)             |
| Atrial fibrillation                                  | 110 (1.1)         | 130 (1.3)            |
| Coronary artery disease                              | 62 (0.6)          | 66 (0.7)             |
| Angina pectoris                                      | 60 (0.6)          | 60 (0.6)             |
| Ear and labyrinth disorders                          | 53 (0.5)          | 66 (0.7)             |
| Vertigo                                              | 30 (0.3)          | 44 (0.4)             |
| Eye disorders                                        | 48 (0.5)          | 49 (0.5)             |
| Gastrointestinal disorders                           | 390 (3.8)         | 344 (3.4)            |
| Vomiting                                             | 46 (0.5)          | 36 (0.4)             |
| Diarrhoea                                            | 43 (0.4)          | 37 (0.4)             |
| General disorders and administration site conditions | 265 (2.6)         | 222 (2.2)            |
| Chest pain                                           | 107 (1.1)         | 76 (0.7)             |
| Hepatobiliary disorders                              | 86 (0.8)          | 87 (0.9)             |
| Infections and Infestations                          | 584 (5.7)         | 634 (6.2)            |

|                                                                        |           |           |
|------------------------------------------------------------------------|-----------|-----------|
| Pneumonia                                                              | 202 (2.0) | 202 (2.0) |
| Urinary tract infection                                                | 86 (0.8)  | 114 (1.1) |
| Sepsis                                                                 | 41 (0.4)  | 50 (0.5)  |
| Injury, poisoning and procedural complications                         | 384 (3.8) | 392 (3.9) |
| Fall                                                                   | 121 (1.2) | 116 (1.1) |
| Hip fracture                                                           | 43 (0.4)  | 44 (0.4)  |
| Investigations                                                         | 50 (0.5)  | 45 (0.4)  |
| Metabolism and nutrition disorders                                     | 228 (2.2) | 200 (2.0) |
| Dehydration                                                            | 65 (0.6)  | 35 (0.3)  |
| Hyponatraemia                                                          | 41 (0.4)  | 36 (0.4)  |
| Musculoskeletal and connective tissue disorders                        | 216 (2.1) | 255 (2.5) |
| Osteoarthritis                                                         | 61 (0.6)  | 80 (0.8)  |
| Neoplasms benign, malignant and unspecified (incl<br>cysts and polyps) | 358 (3.5) | 368 (3.6) |
| Nervous system disorders                                               | 537 (5.3) | 514 (5.1) |
| Syncope                                                                | 73 (0.7)  | 74 (0.7)  |
| Convulsion                                                             | 62 (0.6)  | 64 (0.6)  |
| Carotid artery stenosis                                                | 58 (0.6)  | 61 (0.6)  |
| Dizziness                                                              | 48 (0.5)  | 39 (0.4)  |
| Headache                                                               | 47 (0.5)  | 30 (0.3)  |
| Epilepsy                                                               | 44 (0.4)  | 31 (0.3)  |
| Psychiatric disorders                                                  | 142 (1.4) | 101 (1.0) |
| Depression                                                             | 45 (0.4)  | 28 (0.3)  |
| Renal and urinary disorders                                            | 194 (1.9) | 182 (1.8) |
| Renal failure acute                                                    | 77 (0.8)  | 66 (0.7)  |

|                                                 |           |           |
|-------------------------------------------------|-----------|-----------|
| Reproductive system and breast disorders        | 51 (0.5)  | 61 (0.6)  |
| Respiratory, thoracic and mediastinal disorders | 226 (2.2) | 202 (2.0) |
| Chronic obstructive pulmonary disease           | 41 (0.4)  | 47 (0.5)  |
| Skin and subcutaneous tissue disorders          | 40 (0.4)  | 42 (0.4)  |
| Vascular disorders                              | 185 (1.8) | 195 (1.9) |
| Hypotension                                     | 40 (0.4)  | 42 (0.4)  |
| Hypertension                                    | 38 (0.4)  | 42 (0.4)  |

**APPENDIX IIB:** Frequency [N (%)] of most commonly reported adverse events leading to permanent treatment discontinuation (at least 0.1% at the patient level in any group) by treatment, primary system organ class and preferred term (treated patients).

|                                                                | ASA-ERDP<br>N (%) | Clopidogrel<br>N (%) |
|----------------------------------------------------------------|-------------------|----------------------|
| Number of patients                                             | 10055 (100.00)    | 10040 (100.00)       |
| Total with adverse events leading to treatment discontinuation | 1650 (16.41)      | 1069 (10.65)         |
| Blood and lymphatic system disorders                           | 16 (0.16)         | 17 (0.17)            |
| Cardiac disorders                                              | 216 (2.15)        | 249 (2.48)           |
| Atrial fibrillation                                            | 122 (1.21)        | 143 (1.42)           |
| Angina unstable                                                | 23 (0.23)         | 30 (0.30)            |
| Angina pectoris                                                | 22 (0.22)         | 12 (0.12)            |
| Palpitations                                                   | 13 (0.13)         | 3 (0.03)             |
| Coronary artery disease                                        | 8 (0.08)          | 12 (0.12)            |
| Ear and labyrinth disorders                                    | 20 (0.20)         | 13 (0.13)            |
| Vertigo                                                        | 19 (0.19)         | 13 (0.13)            |
| Gastrointestinal disorders                                     | 479 (4.76)        | 228 (2.27)           |
| Vomiting                                                       | 158 (1.57)        | 37 (0.37)            |
| Nausea                                                         | 155 (1.54)        | 58 (0.58)            |
| Diarrhoea                                                      | 102 (1.01)        | 42 (0.42)            |
| Abdominal pain upper                                           | 33 (0.33)         | 21 (0.21)            |
| Abdominal discomfort                                           | 25 (0.25)         | 7 (0.07)             |
| Abdominal pain                                                 | 15 (0.15)         | 9 (0.09)             |

|                                                                        |            |           |
|------------------------------------------------------------------------|------------|-----------|
| Dyspepsia                                                              | 12 (0.12)  | 8 (0.08)  |
| Gastrointestinal disorder                                              | 12 (0.12)  | 4 (0.04)  |
| Gastritis                                                              | 11 (0.11)  | 9 (0.09)  |
| Gastrointestinal haemorrhage                                           | 11 (0.11)  | 7 (0.07)  |
| Dysphagia                                                              | 7 (0.07)   | 11 (0.11) |
| General disorders and administration site conditions                   | 116 (1.15) | 57 (0.57) |
| Fatigue                                                                | 25 (0.25)  | 14 (0.14) |
| Asthenia                                                               | 21 (0.21)  | 12 (0.12) |
| Chest pain                                                             | 15 (0.15)  | 5 (0.05)  |
| Pain                                                                   | 13 (0.13)  | 2 (0.02)  |
| Malaise                                                                | 10 (0.10)  | 7 (0.07)  |
| Immune system disorders                                                | 8 (0.08)   | 11 (0.11) |
| Infections and Infestations                                            | 45 (0.45)  | 40 (0.40) |
| Pneumonia                                                              | 15 (0.15)  | 16 (0.16) |
| Injury, poisoning and procedural complications                         | 23 (0.23)  | 43 (0.43) |
| Contusion                                                              | 0 (0.00)   | 12 (0.12) |
| Investigations                                                         | 26 (0.26)  | 14 (0.14) |
| Metabolism and nutrition disorders                                     | 24 (0.24)  | 14 (0.14) |
| Anorexia                                                               | 10 (0.10)  | 2 (0.02)  |
| Musculoskeletal and connective tissue disorders                        | 70 (0.70)  | 43 (0.43) |
| Myalgia                                                                | 31 (0.31)  | 15 (0.15) |
| Arthralgia                                                             | 12 (0.12)  | 9 (0.09)  |
| Neoplasms benign, malignant and unspecified (incl<br>cysts and polyps) | 81 (0.81)  | 87 (0.87) |
| Lung neoplasm malignant                                                | 7 (0.07)   | 10 (0.10) |

|                                                 |            |            |
|-------------------------------------------------|------------|------------|
| Neoplasm malignant                              | 5 (0.05)   | 10 (0.10)  |
| Nervous system disorders                        | 719 (7.15) | 180 (1.79) |
| Headache                                        | 593 (5.90) | 87 (0.87)  |
| Dizziness                                       | 134 (1.33) | 52 (0.52)  |
| Syncope                                         | 8 (0.08)   | 10 (0.10)  |
| Psychiatric disorders                           | 46 (0.46)  | 26 (0.26)  |
| Depression                                      | 13 (0.13)  | 8 (0.08)   |
| Renal and urinary disorders                     | 29 (0.29)  | 22 (0.22)  |
| Respiratory, thoracic and mediastinal disorders | 37 (0.37)  | 38 (0.38)  |
| Skin and subcutaneous tissue disorders          | 63 (0.63)  | 88 (0.88)  |
| Rash                                            | 26 (0.26)  | 35 (0.35)  |
| Pruritus                                        | 9 (0.09)   | 10 (0.10)  |
| Surgical and medical procedures                 | 24 (0.24)  | 17 (0.17)  |
| Vascular disorders                              | 87 (0.87)  | 77 (0.77)  |
| Hypotension                                     | 54 (0.54)  | 35 (0.35)  |

### **APPENDIX III: Calculation of stroke risk score.**

Before database lock, a stroke risk score was generated from the blinded trial data by considering all baseline characteristics from five selected risk scores from the literature (Framingham, SPI-II, Essen, NOMASS-7, NOMAS global vascular risk) in a Cox regression model. The final model included all statistically significant predictors of stroke: age, gender, physical activity, baseline systolic blood pressure, history of hypertension, diabetes, previous MI, atrial fibrillation, peripheral arterial disease, and stroke prior to qualifying event. The risk score for PRoFESS is calculated as the sum of the linear combination of the above 10 variables. The weight of each variable is the corresponding coefficient: ((Age-48) X 0.2 (e.g., add 0.2 for each year older than 48) + Gender male X 2 + Physical activity classified as sedentary X 2 + (Baseline systolic BP – 90) X 0.05 (e.g., add 0.05 for each SBP unit > 90) + History of Hypertension X 2 + Diabetes mellitus X 4 + Previous MI X 2 + Atrial fibrillation X 3 + PAOD X 3 + Stroke in addition to qualifying event X 6).

Within PRoFESS, incidences of stroke for each stroke risk score tertile were: Low risk: 5.5%; Moderate risk: 8.1%; High risk: 13.3%
